# Supplementary material for: Odontostomatological Traits in North-Eastern Italy’s Isolated Populations: An Epidemiological Cross-Sectional Study
Source: MDPI journal article supplement (doi:10.3390/jcm12072746), 2023-04-06
Supplement: s1 [file s1]

**Supplementary Table S1. Post-hoc power calculation for the logistic models.**

| <b>Response variable (Y)</b> | <b>Risk factor (X)</b> | <b>Sample size</b> | <b>P(Y=1   X=0)<sup>a</sup></b> | <b>P(Y=1   X=1)<sup>b</sup></b> | <b>Significance level</b> | <b>Power<sup>c</sup></b> |
|------------------------------|------------------------|--------------------|---------------------------------|---------------------------------|---------------------------|--------------------------|
| Phonetic issues              | Ankyloglossia          | 728                | 0.204                           | 0.392                           | 0.05                      | <b>1</b>                 |
| Click/Noise                  | Bruxism                | 737                | 0.321                           | 0.457                           | 0.05                      | <b>0.96</b>              |
| Pain                         | Bruxism                | 725                | 0.059                           | 0.128                           | 0.05                      | <b>0.88</b>              |
| Mandibular deviation         | Bruxism                | 731                | 0.253                           | 0.248                           | 0.05                      | <b>0.05</b>              |
| Opening limitation           | Bruxism                | 717                | 0.025                           | 0.034                           | 0.05                      | <b>0.11</b>              |

<sup>a</sup>The probability of having positive outcome (Y=1) in the absence of the risk factor (X=0).

<sup>b</sup>The probability of having positive outcome (Y=1) in the presence of the risk factor (X=1).

<sup>c</sup>Calculated using the WebPower package of the R software.
